# Supplementary material for: Associations between Pharmacological Treatment Patterns during the Initial Treatment Period and the Relapse or Recurrence of Anxiety Disorders: A Nationwide Retrospective Cohort Study
Source: MDPI journal article supplement (doi:10.3390/life13051197), 2023-05-17
Supplement: s1 [file s1]

## Supplementary Materials

**Supplementary Table S1.** Relapse rate by general and clinical characteristics of participants

|                                                          | No<br>relapse/recurrence |       | Relapse/recurrence |       | <i>P-value</i><br><sup>a</sup> |
|----------------------------------------------------------|--------------------------|-------|--------------------|-------|--------------------------------|
|                                                          | N                        | (%)   | N                  | (%)   |                                |
| <b>Total</b>                                             | 13,781                   | 40.09 | 20,597             | 59.91 |                                |
| <b>Continuous pharmacological treatment</b>              |                          |       |                    |       |                                |
| No                                                       | 10,782                   | 78.24 | 15,574             | 75.61 | <0.0001                        |
| Yes                                                      | 2,999                    | 21.76 | 5,023              | 24.39 |                                |
| <b>Age (years)</b>                                       |                          |       |                    |       |                                |
| Mean ± standard deviation                                | 41.40±12.79              |       | 41.69±12.42        |       | 0.0421                         |
| 18–29                                                    | 2,972                    | 21.57 | 3,962              | 19.24 | <0.0001                        |
| 30–39                                                    | 3,109                    | 22.56 | 5,008              | 24.31 |                                |
| 40–49                                                    | 3,470                    | 25.18 | 5,356              | 26.00 |                                |
| 50–59                                                    | 3,073                    | 22.30 | 4,516              | 21.93 |                                |
| 60–69                                                    | 1,157                    | 8.40  | 1,755              | 8.52  |                                |
| <b>Sex</b>                                               |                          |       |                    |       |                                |
| Male                                                     | 6,028                    | 43.74 | 9,382              | 45.55 | 0.0009                         |
| Female                                                   | 7,753                    | 56.26 | 11,215             | 54.45 |                                |
| <b>Primary diagnosis during initial treatment period</b> |                          |       |                    |       |                                |
| F40                                                      | 1,086                    | 7.88  | 1,944              | 9.44  | <0.0001                        |
| F41                                                      | 12,695                   | 92.12 | 18,653             | 90.56 |                                |
| <b>Charlson comorbidity index<sup>9</sup></b>            |                          |       |                    |       |                                |
| 0                                                        | 10,102                   | 73.30 | 14,737             | 71.55 | 0.0052                         |
| 1                                                        | 1,956                    | 14.19 | 3,117              | 15.13 |                                |

|                                                                                   |        |       |        |       |         |
|-----------------------------------------------------------------------------------|--------|-------|--------|-------|---------|
| 2                                                                                 | 1,221  | 8.86  | 1,934  | 9.39  |         |
| ≥3                                                                                | 502    | 3.64  | 809    | 3.93  |         |
| <b>Specialty of physician</b>                                                     |        |       |        |       |         |
| Psychiatry                                                                        | 12,695 | 92.12 | 18,573 | 90.17 | <0.0001 |
| Non-psychiatry                                                                    | 1,086  | 7.88  | 2,024  | 9.83  |         |
| <b>Number of follow-up visits for the first 3 months</b>                          |        |       |        |       |         |
| <3 (less than three)                                                              | 3,471  | 25.19 | 7,771  | 37.73 | <0.0001 |
| 3≤ (three or more)                                                                | 10,310 | 74.81 | 12,826 | 62.27 |         |
| <b>Initial choice of antidepressants</b>                                          |        |       |        |       |         |
| No antidepressant medications                                                     | 1,777  | 12.89 | 3,104  | 15.07 | <0.0001 |
| Use of one antidepressant                                                         | 10,601 | 76.92 | 15,699 | 76.22 |         |
| Combined use of antidepressants                                                   | 1,403  | 10.18 | 1,794  | 8.71  |         |
| <b>Initial choice of other psychiatric medication</b>                             |        |       |        |       |         |
| No other psychiatric medication                                                   | 2,526  | 18.33 | 3,459  | 16.79 | <0.0001 |
| Use of one other psychiatric medication                                           | 9,199  | 66.75 | 14,463 | 70.22 |         |
| Combined use of other psychiatric medication                                      | 2,056  | 14.92 | 2,675  | 12.99 |         |
| <b>Last antidepressant prescription of initial treatment period</b>               |        |       |        |       |         |
| No antidepressants medications                                                    | 683    | 4.96  | 1,846  | 8.96  | <0.0001 |
| Use of one antidepressant                                                         | 10,958 | 79.52 | 16,334 | 79.30 |         |
| Combined use of antidepressants                                                   | 2,140  | 15.53 | 2,417  | 11.73 |         |
| <b>Last other psychiatric medication prescription of initial treatment period</b> |        |       |        |       |         |
| No other psychiatric medication                                                   | 3,713  | 26.94 | 4,922  | 23.90 | <0.0001 |
| Use of one other psychiatric medication                                           | 7,831  | 56.82 | 12,959 | 62.92 |         |

|                                              |       |       |       |       |
|----------------------------------------------|-------|-------|-------|-------|
| Combined use of other psychiatric medication | 2,237 | 16.23 | 2,716 | 13.19 |
|----------------------------------------------|-------|-------|-------|-------|

**Number of used categories of antidepressant during initial treatment period**

|    |       |       |        |       |         |
|----|-------|-------|--------|-------|---------|
| 0  | -     | 0.00  | 917    | 4.45  | <0.0001 |
| 1  | 8,294 | 60.18 | 13,407 | 65.09 |         |
| 2  | 3,785 | 27.47 | 4,475  | 21.73 |         |
| ≥3 | 1,702 | 12.35 | 1,798  | 8.73  |         |

---

<sup>a</sup>. p-value were obtained using chi-square tests and Student's t-tests.

**Supplementary Table S2.** Sensitivity analysis concerning definitions of the participant with continuous pharmacological treatment (>365 days).

Cox proportional hazard regression for the relapse/recurrence of anxiety disorders

|                                            | Unadjusted HR (95% CI) | p-value | Adjusted HR (95% CI) | p-value |
|--------------------------------------------|------------------------|---------|----------------------|---------|
| <b>Continuous antidepressant treatment</b> |                        |         |                      |         |
| No                                         |                        |         |                      |         |
| Yes                                        | 1.436 (1.377-1.497)    | <0.0001 | 1.681 (1.609-1.757)  | <0.0001 |
| <b>Age (years)</b>                         |                        |         |                      |         |
| 18–29                                      |                        |         |                      |         |
| 30–39                                      | 1.139 (1.093–1.188)    | <0.0001 | 1.129 (1.082–1.177)  | <0.0001 |
| 40–49                                      | 1.117 (1.072–1.163)    | <0.0001 | 1.098 (1.054–1.145)  | <0.0001 |
| 50–59                                      | 1.07 (1.026–1.117)     | 0.0018  | 1.038 (0.994–1.085)  | 0.0917  |
| 60–69                                      | 1.091 (1.032–1.155)    | 0.0023  | 1.058 (0.999–1.121)  | 0.0533  |
| <b>Sex</b>                                 |                        |         |                      |         |
| Female                                     |                        |         |                      |         |
| Male                                       | 1.061 (1.033–1.091)    | <0.0001 | 1.044 (1.015–1.073)  | 0.0024  |

**Primary diagnosis during initial treatment period**

F40

F41

0.887 (0.846–0.929)

&lt;0.0001

0.902 (0.860–0.946)

&lt;0.0001

**Charlson comorbidity index<sup>9</sup>**

0

1

1.057 (1.017–1.099)

0.005

2

1.062 (1.013–1.114)

0.0126

≥3

1.113 (1.037–1.195)

0.003

**Specialty of physician**

Non-psychiatry

Psychiatry

0.837 (0.800–0.877)

&lt;0.0001

0.901 (0.859–0.944)

&lt;0.0001

**Number of follow-up visits during the first three months**

&lt;3 (less than three)

3≤ (three or more)

0.783 (0.762–0.806)

&lt;0.0001

0.8 (0.776–0.825)

&lt;0.0001

**Initial choice of antidepressants**

No antidepressant medications

|                                 |                     |         |                     |         |
|---------------------------------|---------------------|---------|---------------------|---------|
| Use of one antidepressant       | 0.859 (0.827–0.893) | <0.0001 | 1.085 (1.036–1.136) | 0.0003  |
| Combined use of antidepressants | 0.788 (0.744–0.836) | <0.0001 | 1.209 (1.126–1.299) | <0.0001 |

**Initial choice of other psychiatric medication**

No other psychiatric medication

|                                              |                     |         |                     |        |
|----------------------------------------------|---------------------|---------|---------------------|--------|
| Use of one other psychiatric medication      | 1.096 (1.056–1.138) | <0.0001 | 1.003 (0.957–1.051) | 0.8972 |
| Combined use of other psychiatric medication | 0.979 (0.930–1.029) | 0.4014  | 1.002 (0.939–1.070) | 0.9742 |

**Last choice of antidepressants**

No antidepressant medications

|                                 |                     |         |                     |        |
|---------------------------------|---------------------|---------|---------------------|--------|
| Use of one antidepressant       | 0.661 (0.629–0.693) | <0.0001 | 1.029 (0.962–1.101) | 0.4088 |
| Combined use of antidepressants | 0.56 (0.527–0.595)  | <0.0001 | 0.973 (0.895–1.056) | 0.5087 |

**Last choice of other psychiatric medication**

No other psychiatric medication

|                                         |                     |         |                     |         |
|-----------------------------------------|---------------------|---------|---------------------|---------|
| Use of one other psychiatric medication | 1.159 (1.122–1.198) | <0.0001 | 1.146 (1.099–1.195) | <0.0001 |
|-----------------------------------------|---------------------|---------|---------------------|---------|

|                                                                                    |                     |         |                     |         |
|------------------------------------------------------------------------------------|---------------------|---------|---------------------|---------|
| Combined use of other psychiatric medication                                       | 0.965 (0.921–1.011) | 0.1344  | 1.013 (0.954–1.076) | 0.3107  |
| <b>Number of used categories of antidepressant during initial treatment period</b> |                     |         |                     |         |
| 0                                                                                  |                     |         |                     |         |
| 1                                                                                  | 0.305 (0.285–0.326) | <0.0001 | 0.309 (0.279–0.342) | <0.0001 |
| 2                                                                                  | 0.253 (0.235–0.271) | <0.0001 | 0.253 (0.228–0.282) | <0.0001 |
| ≥3                                                                                 | 0.245 (0.226–0.266) | <0.0001 | 0.238 (0.212–0.266) | <0.0001 |

---

**Supplementary Table S3.** Sensitivity analysis concerning definitions of the participant with continuous pharmacological treatment (>540 days).

Cox proportional hazard regression for the relapse/recurrence of anxiety disorders

|                                            | Unadjusted HR (95% CI) | p-value | Adjusted HR (95% CI) | p-value |
|--------------------------------------------|------------------------|---------|----------------------|---------|
| <b>Continuous antidepressant treatment</b> |                        |         |                      |         |
| No                                         |                        |         |                      |         |
| Yes                                        | 1.500 (1.423–1.581)    | <0.0001 | 1.744 (1.651–1.842)  | <0.0001 |
| <b>Age (years)</b>                         |                        |         |                      |         |
| 18–29                                      |                        |         |                      |         |
| 30–39                                      | 1.139 (1.093–1.188)    | <0.0001 | 1.134 (1.087–1.182)  | <0.0001 |
| 40–49                                      | 1.117 (1.072–1.163)    | <0.0001 | 1.105 (1.060–1.152)  | <0.0001 |
| 50–59                                      | 1.07 (1.026–1.117)     | 0.0018  | 1.043 (0.998–1.090)  | 0.0587  |
| 60–69                                      | 1.091 (1.032–1.155)    | 0.0023  | 1.064 (1.005–1.127)  | 0.0340  |
| <b>Sex</b>                                 |                        |         |                      |         |
| Female                                     |                        |         |                      |         |
| Male                                       | 1.061 (1.033–1.091)    | <0.0001 | 1.045 (1.016–1.074)  | 0.0019  |



**Primary diagnosis during initial treatment period**

F40

F41

0.887 (0.846–0.929)

&lt;0.0001

0.898 (0.856–0.942)

&lt;0.0001

**Charlson comorbidity index<sup>9</sup>**

0

1

1.057 (1.017–1.099)

0.005

2

1.062 (1.013–1.114)

0.0126

≥3

1.113 (1.037–1.195)

0.003

**Specialty of physician**

Non-psychiatry

Psychiatry

0.837 (0.800–0.877)

&lt;0.0001

0.898 (0.857–0.941)

&lt;0.0001

**Number of follow-up visits during the first three months**

&lt;3 (less than three)

3≤ (three or more)

0.783 (0.762–0.806)

&lt;0.0001

0.849 (0.824–0.875)

&lt;0.0001

**Initial choice of antidepressants**

No antidepressant medications

|                                 |                     |         |                     |         |
|---------------------------------|---------------------|---------|---------------------|---------|
| Use of one antidepressant       | 0.859 (0.827–0.893) | <0.0001 | 1.079 (1.030–1.130) | 0.0013  |
| Combined use of antidepressants | 0.788 (0.744–0.836) | <0.0001 | 1.195 (1.112–1.284) | <0.0001 |

**Initial choice of other psychiatric medication**

No other psychiatric medication

|                                              |                     |         |                     |        |
|----------------------------------------------|---------------------|---------|---------------------|--------|
| Use of one other psychiatric medication      | 1.096 (1.056–1.138) | <0.0001 | 1.014 (0.967–1.063) | 0.5650 |
| Combined use of other psychiatric medication | 0.979 (0.930–1.029) | 0.4014  | 1.010 (0.946–1.078) | 0.7696 |

**Last choice of antidepressants**

No antidepressant medications

|                                 |                     |         |                     |        |
|---------------------------------|---------------------|---------|---------------------|--------|
| Use of one antidepressant       | 0.661 (0.629–0.693) | <0.0001 | 1.009 (0.943–1.079) | 0.7984 |
| Combined use of antidepressants | 0.56 (0.527–0.595)  | <0.0001 | 0.947 (0.872–1.028) | 0.1951 |

**Last choice of other psychiatric medication**

No other psychiatric medication

|                                         |                     |         |                     |         |
|-----------------------------------------|---------------------|---------|---------------------|---------|
| Use of one other psychiatric medication | 1.159 (1.122–1.198) | <0.0001 | 1.124 (1.078–1.172) | <0.0001 |
|-----------------------------------------|---------------------|---------|---------------------|---------|

|                                                                                    |                     |         |                     |         |
|------------------------------------------------------------------------------------|---------------------|---------|---------------------|---------|
| Combined use of other psychiatric medication                                       | 0.965 (0.921–1.011) | 0.1344  | 0.996 (0.937–1.058) | 0.8873  |
| <b>Number of used categories of antidepressant during initial treatment period</b> |                     |         |                     |         |
| 0                                                                                  |                     |         |                     |         |
| 1                                                                                  | 0.305 (0.285–0.326) | <0.0001 | 0.315 (0.284–0.349) | <0.0001 |
| 2                                                                                  | 0.253 (0.235–0.271) | <0.0001 | 0.261 (0.234–0.290) | <0.0001 |
| ≥3                                                                                 | 0.245 (0.226–0.266) | <0.0001 | 0.248 (0.221–0.277) | <0.0001 |

---

**Supplementary Table S4.** Sensitivity analysis concerning definitions of the participant with continuous pharmacological treatment (>730 days).

Cox proportional hazard regression for the relapse/recurrence of anxiety disorders

|                                            | Unadjusted HR (95% CI) | p-value | Adjusted HR (95% CI) | p-value |
|--------------------------------------------|------------------------|---------|----------------------|---------|
| <b>Continuous antidepressant treatment</b> |                        |         |                      |         |
| No                                         |                        |         |                      |         |
| Yes                                        | 1.533 (1.433-1.640)    | <0.0001 | 1.782 (1.662-1.909)  | <0.0001 |
| <b>Age (years)</b>                         |                        |         |                      |         |
| 18–29                                      |                        |         |                      |         |
| 30–39                                      | 1.139 (1.093–1.188)    | <0.0001 | 1.139 (1.092–1.188)  | <0.0001 |
| 40–49                                      | 1.117 (1.072–1.163)    | <0.0001 | 1.110 (1.065–1.157)  | <0.0001 |
| 50–59                                      | 1.07 (1.026–1.117)     | 0.0018  | 1.049 (1.004–1.096)  | 0.0314  |
| 60–69                                      | 1.091 (1.032–1.155)    | 0.0023  | 1.067 (1.008–1.130)  | 0.0264  |
| <b>Sex</b>                                 |                        |         |                      |         |
| Female                                     |                        |         |                      |         |
| Male                                       | 1.061 (1.033–1.091)    | <0.0001 | 1.047 (1.019–1.077)  | 0.0010  |

**Primary diagnosis during initial treatment period**

F40

F41

0.887 (0.846–0.929)

&lt;0.0001

0.897 (0.855–0.941)

&lt;0.0001

**Charlson comorbidity index<sup>9</sup>**

0

1

1.057 (1.017–1.099)

0.005

2

1.062 (1.013–1.114)

0.0126

≥3

1.113 (1.037–1.195)

0.003

**Specialty of physician**

Non-psychiatry

Psychiatry

0.837 (0.800–0.877)

&lt;0.0001

0.898 (0.857–0.941)

&lt;0.0001

**Number of follow-up visits during the first three months**

&lt;3 (less than three)

3≤ (three or more)

0.783 (0.762–0.806)

&lt;0.0001

0.858 (0.833–0.885)

&lt;0.0001

**Initial choice of antidepressants**

|                                                       |                     |         |                     |         |
|-------------------------------------------------------|---------------------|---------|---------------------|---------|
| No antidepressant medications                         |                     |         |                     |         |
| Use of one antidepressant                             | 0.859 (0.827–0.893) | <0.0001 | 1.078 (1.029–1.129) | 0.0015  |
| Combined use of antidepressants                       | 0.788 (0.744–0.836) | <0.0001 | 1.187 (1.105–1.275) | <0.0001 |
| <b>Initial choice of other psychiatric medication</b> |                     |         |                     |         |
| No other psychiatric medication                       |                     |         |                     |         |
| Use of one other psychiatric medication               | 1.096 (1.056–1.138) | <0.0001 | 1.021 (0.974–1.070) | 0.3952  |
| Combined use of other psychiatric medication          | 0.979 (0.930–1.029) | 0.4014  | 1.015 (0.951–1.083) | 0.6611  |
| <b>Last choice of antidepressants</b>                 |                     |         |                     |         |
| No antidepressant medications                         |                     |         |                     |         |
| Use of one antidepressant                             | 0.661 (0.629–0.693) | <0.0001 | 1.000 (0.935–1.070) | 0.9971  |
| Combined use of antidepressants                       | 0.56 (0.527–0.595)  | <0.0001 | 0.938 (0.864–1.019) | 0.1314  |
| <b>Last choice of other psychiatric medication</b>    |                     |         |                     |         |
| No other psychiatric medication                       |                     |         |                     |         |
| Use of one other psychiatric medication               | 1.159 (1.122–1.198) | <0.0001 | 1.112 (1.067–1.160) | <0.0001 |

|                                                                                    |                     |         |                     |         |
|------------------------------------------------------------------------------------|---------------------|---------|---------------------|---------|
| Combined use of other psychiatric medication                                       | 0.965 (0.921–1.011) | 0.1344  | 0.986 (0.928–1.047) | 0.6455  |
| <b>Number of used categories of antidepressant during initial treatment period</b> |                     |         |                     |         |
| 0                                                                                  |                     |         |                     |         |
| 1                                                                                  | 0.305 (0.285–0.326) | <0.0001 | 0.319 (0.288–0.354) | <0.0001 |
| 2                                                                                  | 0.253 (0.235–0.271) | <0.0001 | 0.266 (0.239–0.296) | <0.0001 |
| ≥3                                                                                 | 0.245 (0.226–0.266) | <0.0001 | 0.256 (0.229–0.287) | <0.0001 |

---
